# Supplementary material for: Vaporization phosphorization-mediated synthesis of phosphorus-doped TiO2 nanocomposites for combined photodynamic and photothermal therapy of renal cell carcinoma
Source: Royal Society of Chemistry journal article supplement (doi:10.1039/d4tb00213j), 2024-01-01
Supplement: d4tb00213j1.pdf [file d4tb00213j1.pdf]

## Supporting Table

**Table S1.** Primers Used in qRT-PCR.

| <b>Gene</b>            | <b>Forward primer</b>    | <b>Reverse primer</b>   |
|------------------------|--------------------------|-------------------------|
| $\beta$ -actin (human) | GGGAAATCGTGCGTGACATT     | GGAACCGCTCATTGCCAAT     |
| BAX (human)            | TGGCAGCTGACATGTTTTCTG    | TCCCGGAGGAAGTCCAATG     |
| CASP3 (human)          | AGAAATTGTGGAATTGATGCGTG  | AGAAATTGTGGAATTGATGCGTG |
| SOD (human)            | ATGGTGTGGCCGATGTGTCT     | AAACGACTTCCAGCGTTTCCT   |
| HMOX1 (human)          | ACACCCAGGCAGAGAATGCT     | CGAAGACTGGGCTCTCCTTGT   |
| CAT (human)            | GCTGAGGTTGAACAGATAGCCTTC | CACTCGAGCACGGTAGGGA     |
| IL6 (human)            | TGGCTGAAAAAGATGGATGCT    | TCTGCACAGCTCTGGCTTGT    |

**Table S2.** P/TiO<sub>2</sub> NPs ICP-AES Characterization Results.

| <b>Chemical element</b> | <b>Element content</b> |
|-------------------------|------------------------|
| P                       | 6.2940%                |
| Ti                      | 47.3884%               |

**Table S3.** Doping Amount of P in P/TiO<sub>2</sub> NPs.

| <b>Doping element</b> | <b>Actual doping amount</b> | <b>Theoretical doping amount</b> |
|-----------------------|-----------------------------|----------------------------------|
| P                     | 7.37%                       | 16.67%                           |

## Supporting Figures

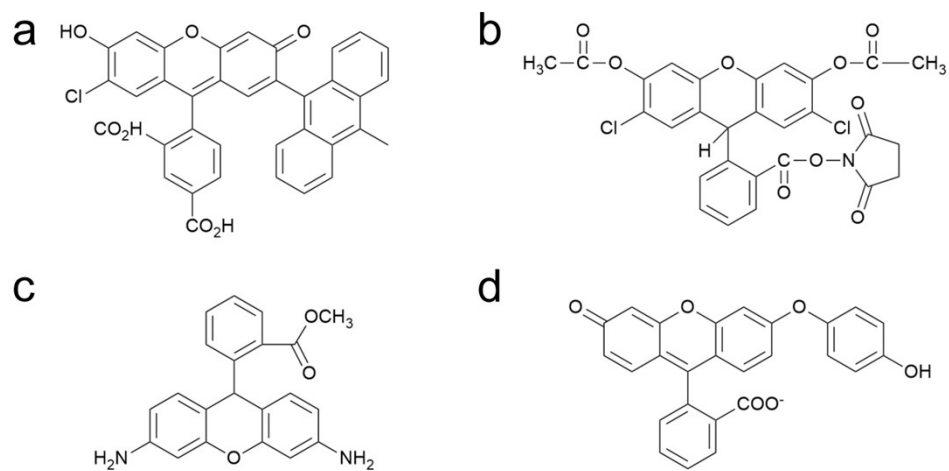

**Figure S1.** Chemical structure of fluorescence probes of  $^1\text{O}_2$  (a),  $\bullet\text{O}_2^-$  (b),  $\text{H}_2\text{O}_2$  (c) and  $\bullet\text{OH}$  (d).

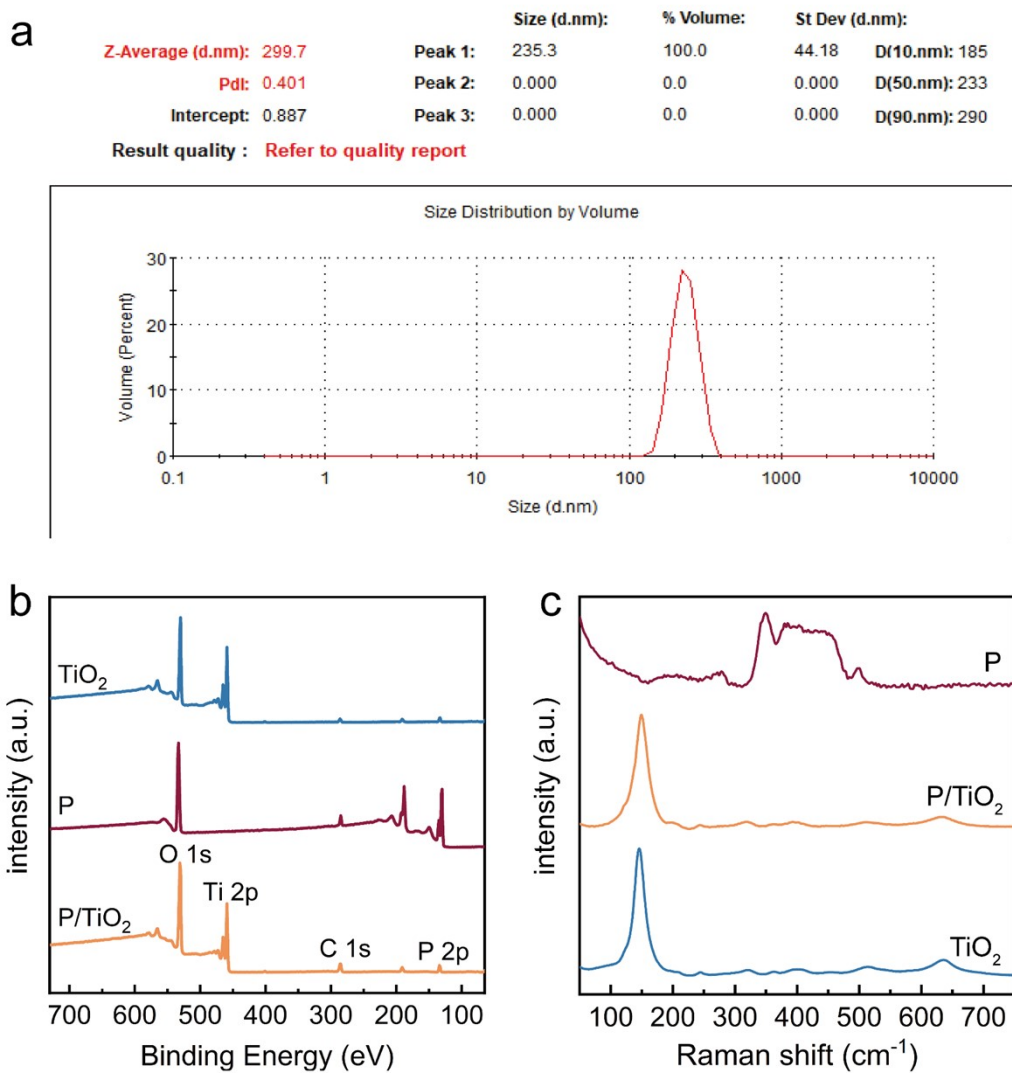

**Figure S2.** (a) Instrument-derived data for DLS size distribution of P/TiO<sub>2</sub> NPs. (b) XPS survey spectra of TiO<sub>2</sub>, phosphorus and P/TiO<sub>2</sub> composites. (c) Raman spectra of TiO<sub>2</sub>, phosphorus and P/TiO<sub>2</sub> composites.

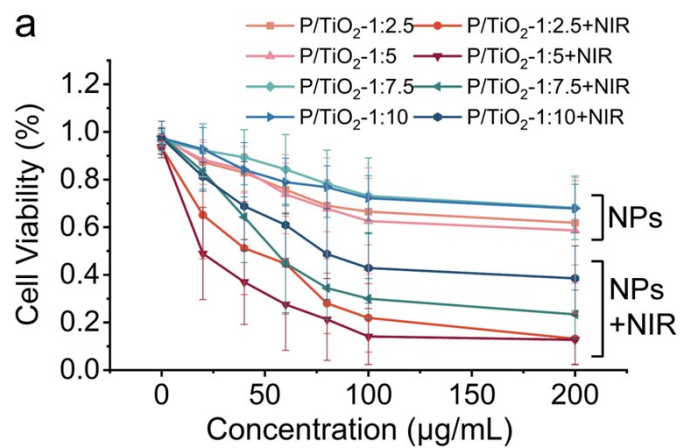

**Figure S3.** (a) The impact of different phosphorus doping ratios on the cytotoxicity of TiO<sub>2</sub> to 786-O cells in the presence or absence of NIR laser exposure. (P/TiO<sub>2</sub>-1:x, x=2.5, 5, 7.5, 10)

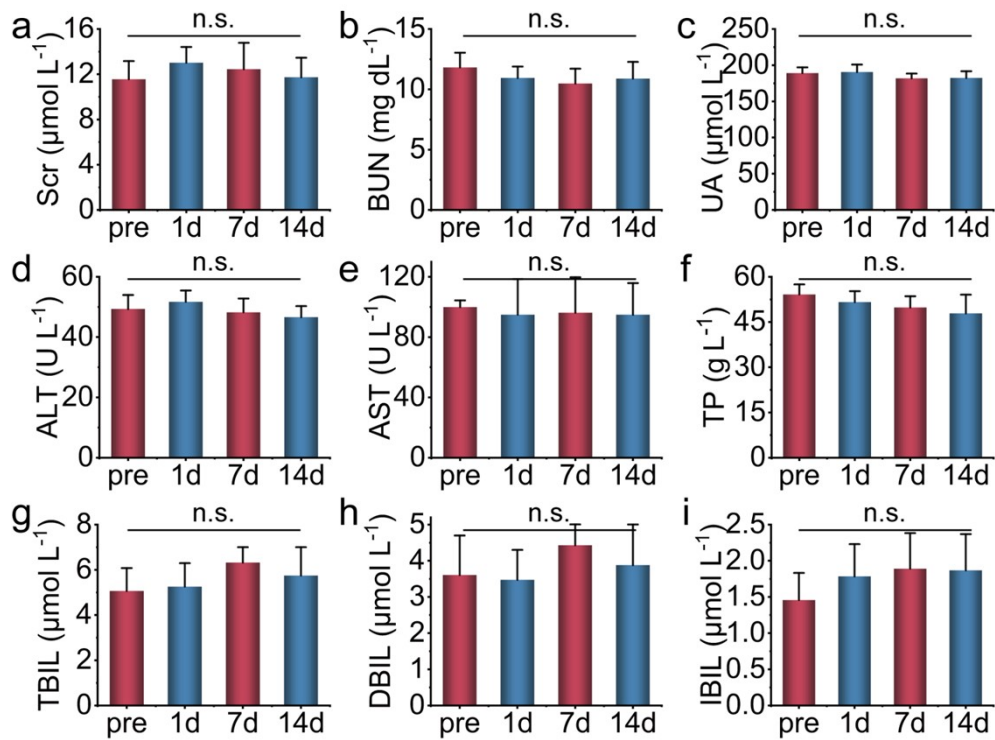

**Figure S4.** Blood biochemistry examinations (Scr (a), BUN (b), UA (c), ALT (d), AST (e), TP (f), TBIL (g), DBIL (h), IBIL (i)) of mice after intravenous injection with P/TiO<sub>2</sub> NPs for 1, 7, and 14 days. Scr, serum creatinine; BUN, blood urea nitrogen; UA, uric acid; ALT, glutamic pyruvic transaminase; AST, glutamic oxalacetic transaminase; TP, total protein; TBIL, total bilirubin; DBIL, direct bilirubin; IBIL, indirect bilirubin.

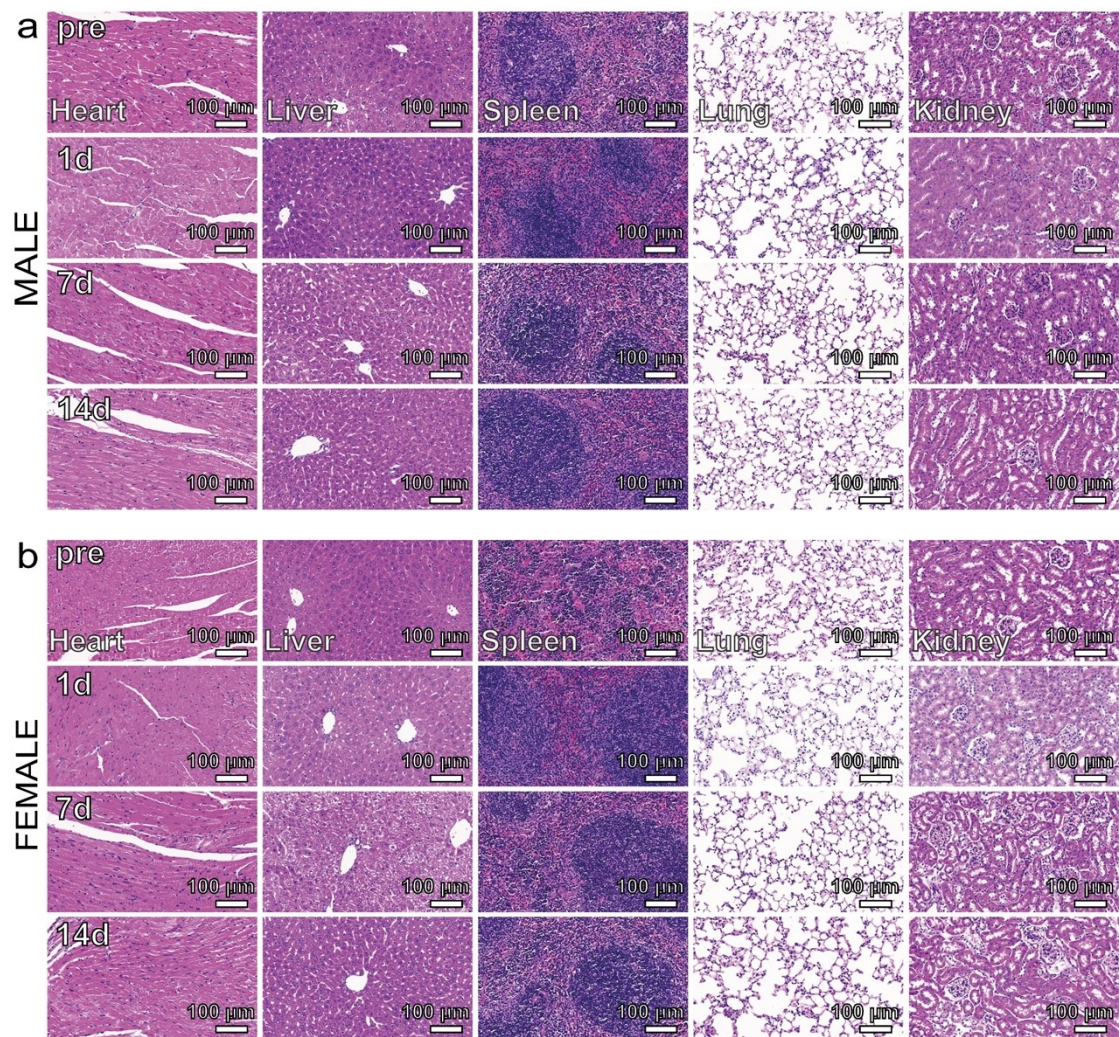

**Figure S5.** H&E staining studies of heart, liver, spleen, lung, and kidney tissues of male (a) and female (b) mice at 1, 7, and 14 d after intravenous injection of P/TiO<sub>2</sub> NPs.



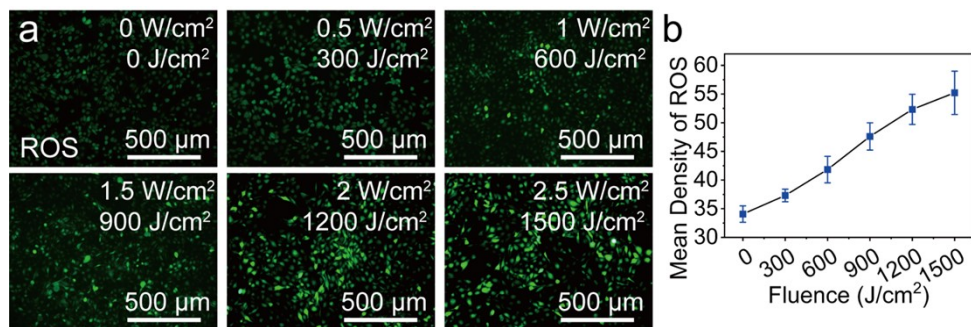

**Figure S6.** (a) Detection of ROS generation in 786-O cells by P/TiO<sub>2</sub> NPs after treatment with 808 nm NIR at different power densities/fluence for 10 min. (b) The fluorescence density was quantified by ImageJ software to establish the light dose response curve with increasing fluence.



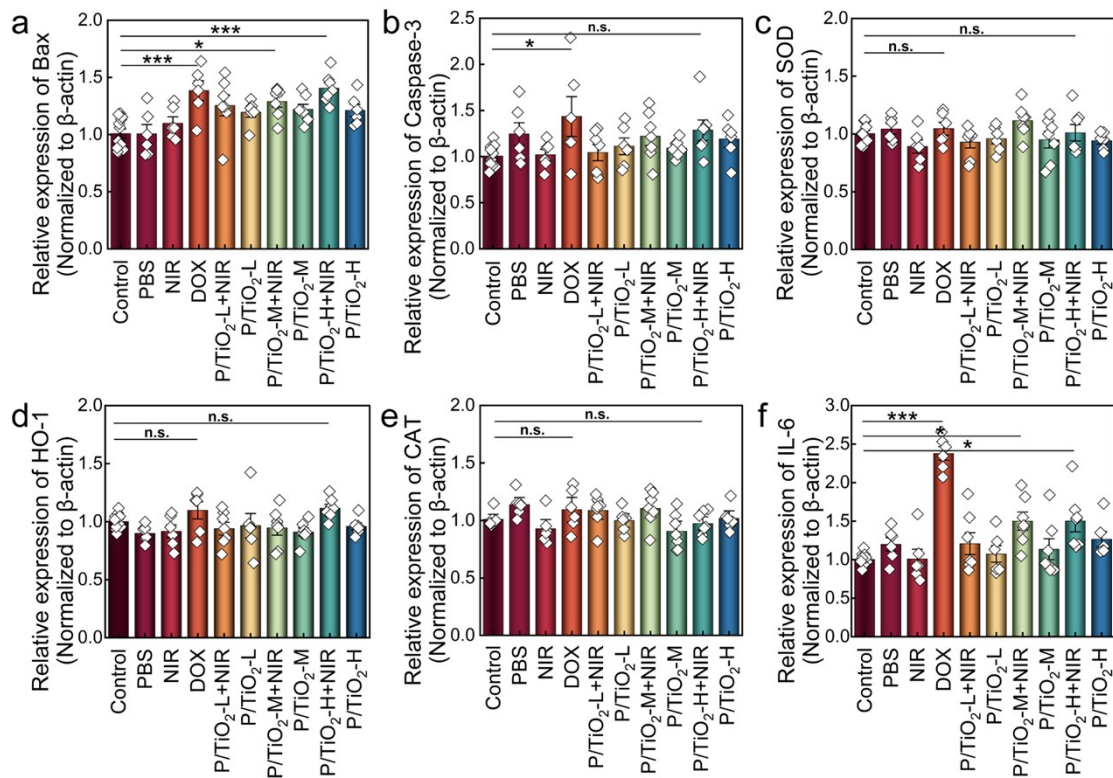

**Figure S7.** Changes of mRNA expression of Bax (a), Caspase-3 (b), SOD (c), HO-1 (d), CAT (e) and IL-6 (f) in HK-2 cells after P/TiO<sub>2</sub> NPs and PDT/PTT treatments. \*:  $p < 0.05$  and \*\*\*:  $p < 0.001$  vs control.

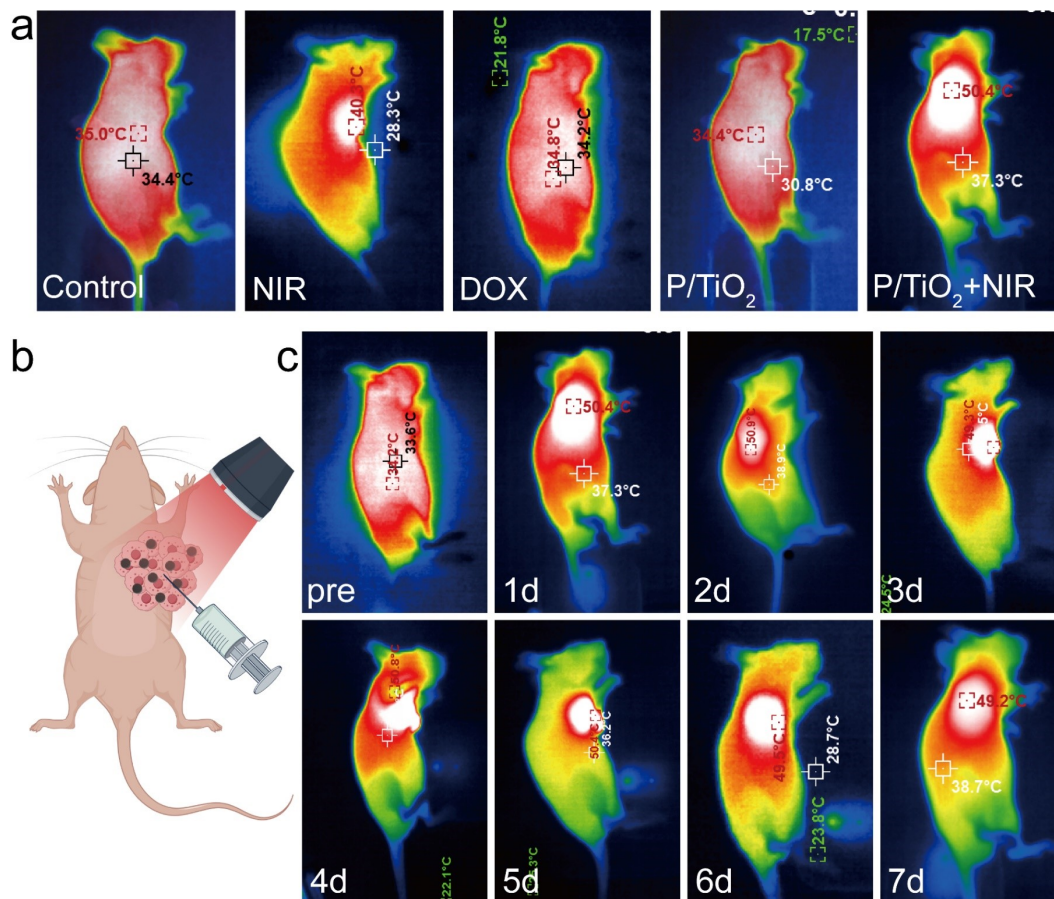

**Figure S8.** (a) and (c) Temperature images of different tumor-bearing mice. The maximum temperature was indicated respectively. (b) The pattern diagram of the animal research design.

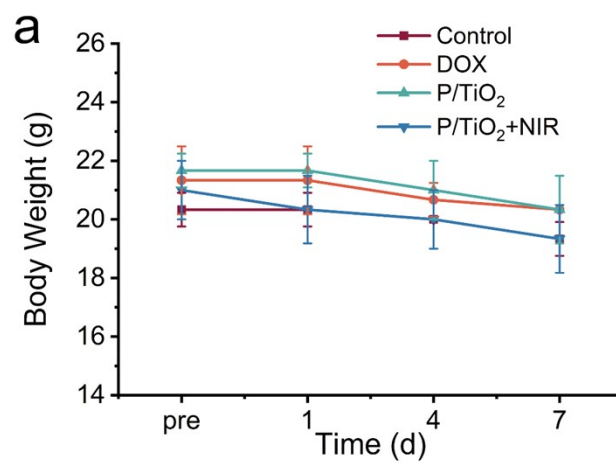

**Figure S9.** (a) Weight changes in tumor-bearing mice were treated with saline, DOX, P/TiO<sub>2</sub> NPs, and P/TiO<sub>2</sub> NPs+NIR for 7 days, respectively.

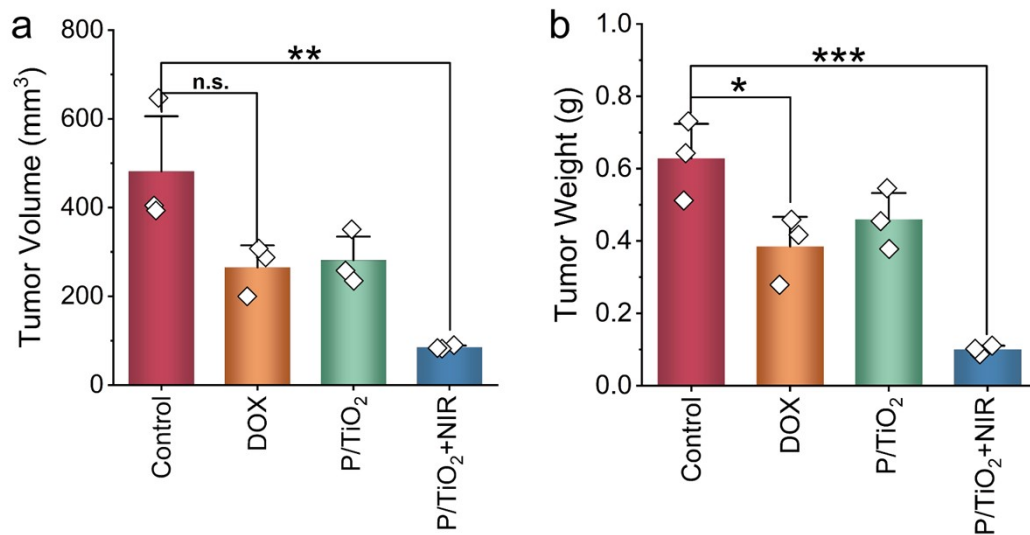

**Figure S10.** (a) Volumes and (b) weights of 786-O tumors after treatment with saline, DOX, P/TiO<sub>2</sub> NPs and P/TiO<sub>2</sub> NPs+NIR for 7 days, respectively.

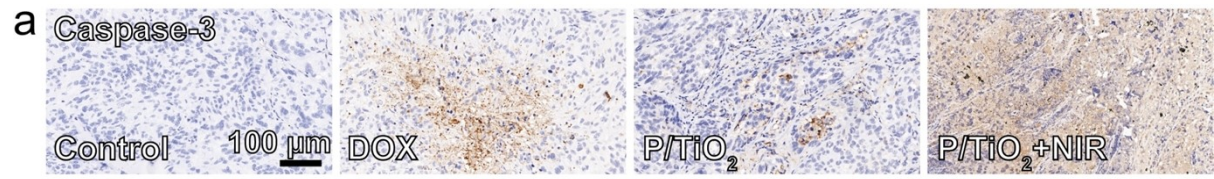

**Figure S11.** (a) Immunohistochemical evaluation of Caspase-3 in 786-O tumors post-treatment, where blue denotes nuclei and brown signifies Caspase-3 expression.
